# Supplementary material for: An amphiphilic interface for constructing a uniform composite solid-state electrolyte towards long-life all-solid-state sodium metal batteries
Source: Royal Society of Chemistry journal article supplement (doi:10.1039/d4ta03309d), 2024-01-01
Supplement: d4ta03309d1.pdf [file d4ta03309d1.pdf]

## Supporting information

### Amphiphilic Interface for Constructing Uniform Composite Solid-State Electrolyte towards Long-Life All-Solid-State Sodium Metal Batteries

Chengyuan Peng,<sup>a</sup> Shizhi Huang,<sup>a</sup> Xuyang Shen,<sup>a</sup> Jingyi Ding,<sup>b</sup> Junrong Luo,<sup>a</sup> Junhao Du,<sup>a</sup> Zongpu Xia,<sup>a</sup> Xinxiang Zhang<sup>a</sup> and Jitao Chen\*<sup>a</sup>

<sup>a</sup> National Laboratory for Molecular Sciences, College of Chemistry and Molecular Engineering, Peking University, Beijing 100871, China.

<sup>b</sup> Suzhou Laboratory, Suzhou, China.

† Chengyuan Peng and Shizhi Huang contributed equally to this work.

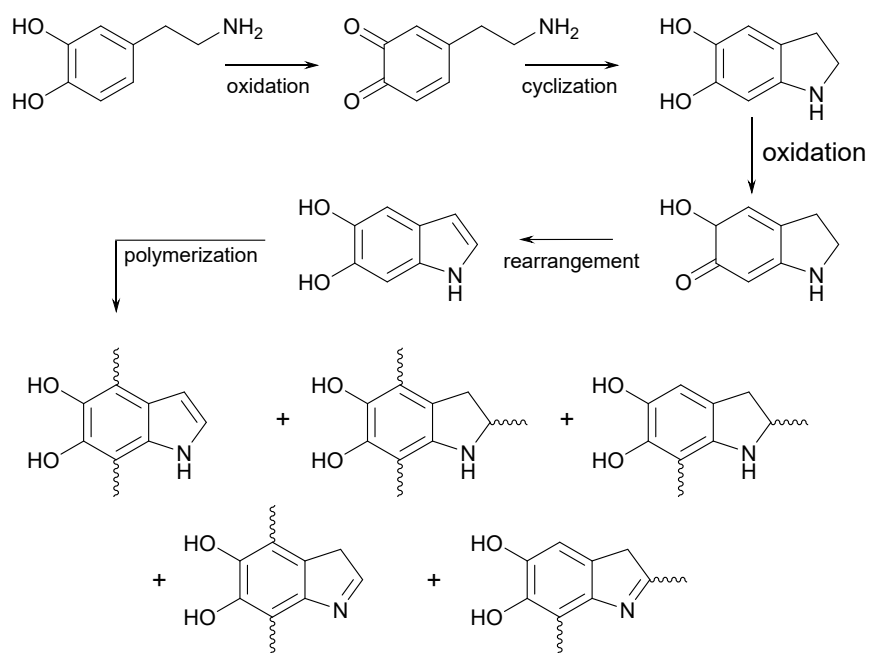

Scheme S1 Oxidative ring-opening self-polymerization of dopamine.

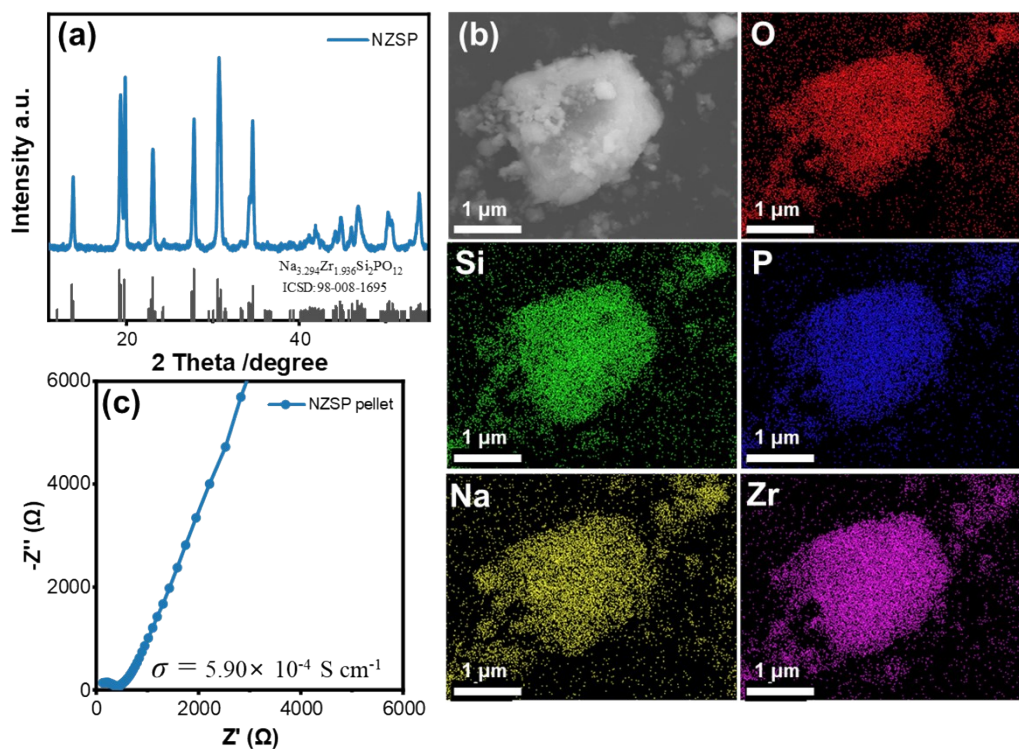

Fig. S1 (a) XRD pattern of sol-gel synthesized NZSP filler; (b) SEM morphology and elements distribution of synthesized NZSP filler; (c) Nyquist plots of synthesized NZSP pellet.

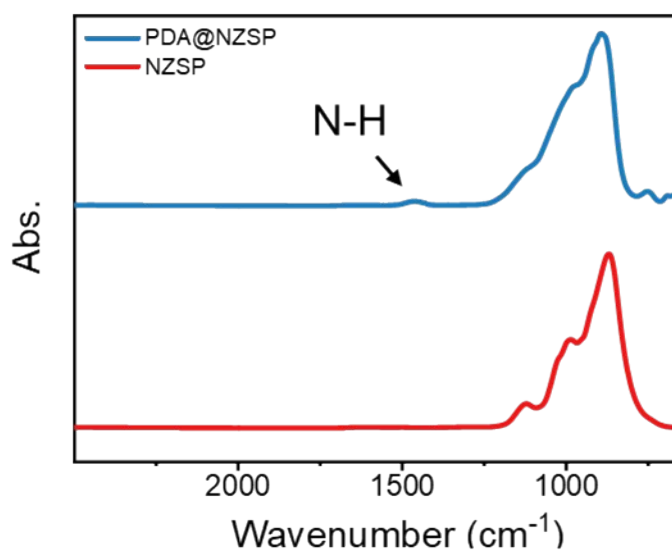

Fig. S2 ATR-FTIR spectra of PDA@NZSP and NZSP.

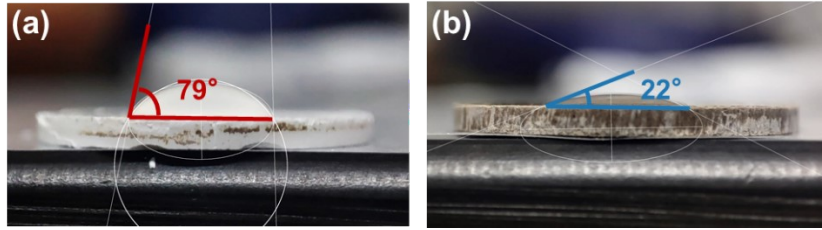

Fig. S3 Contact angle between the PEO acetonitrile solution and NZSP pellet (a) or PDA@NZSP pellet (b).

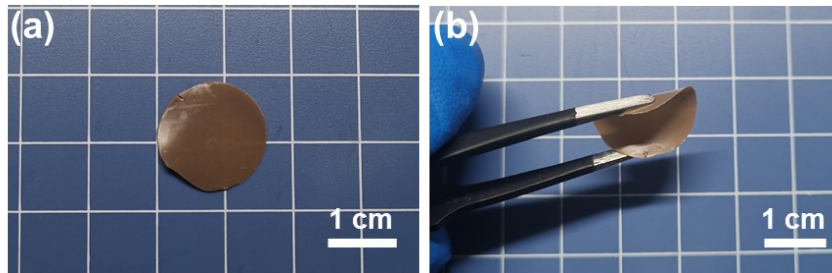

Fig. S4 Optical images of PCSE composite solid-state electrolyte membrane.

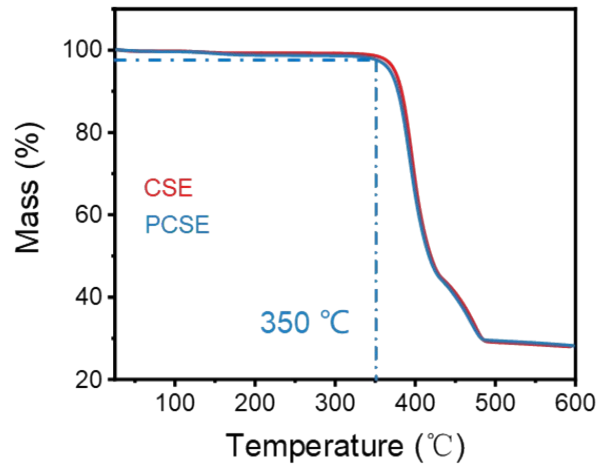

Fig. S5 TGA curves of CSE and PCSE in the temperature range from 25-600°C.

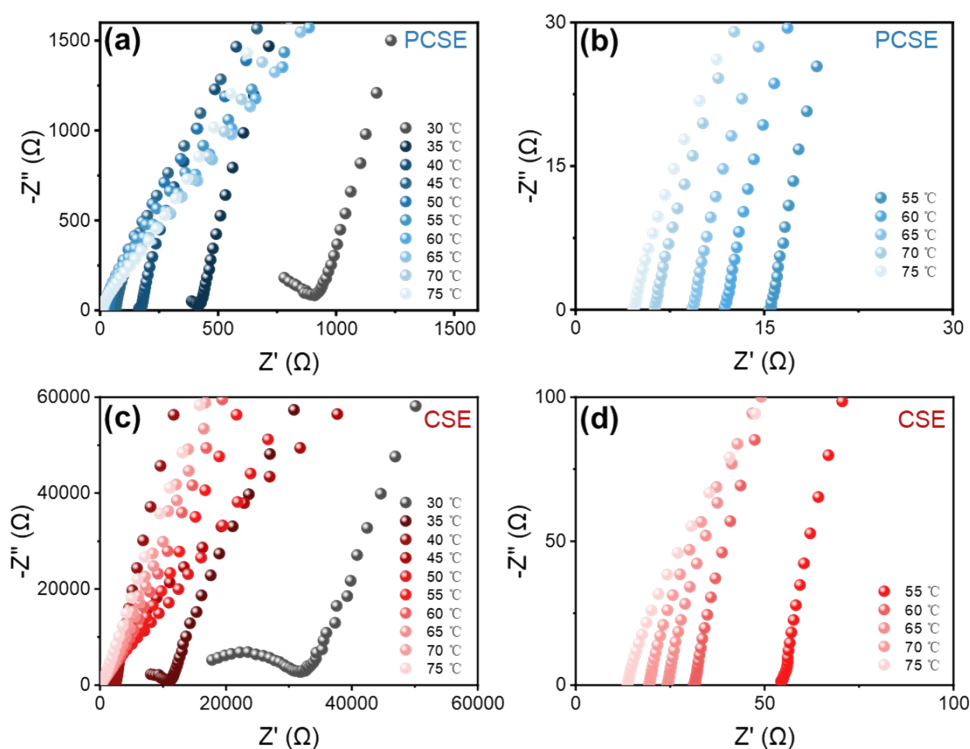

Fig. S6 Nyquist plots of SUS|PCSE|SUS (a, b) and SUS|CSE|SUS (c, d) in the temperature range from 30-75°C.

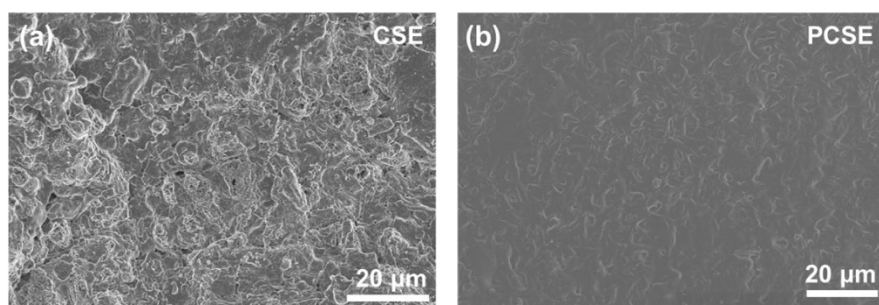

Fig. S7 SEM morphology of the sodium metal anode disassembled from Na|CSE|Na (a) and Na|PCSE|Na (b) after 50 deposition/dissolution cycles.

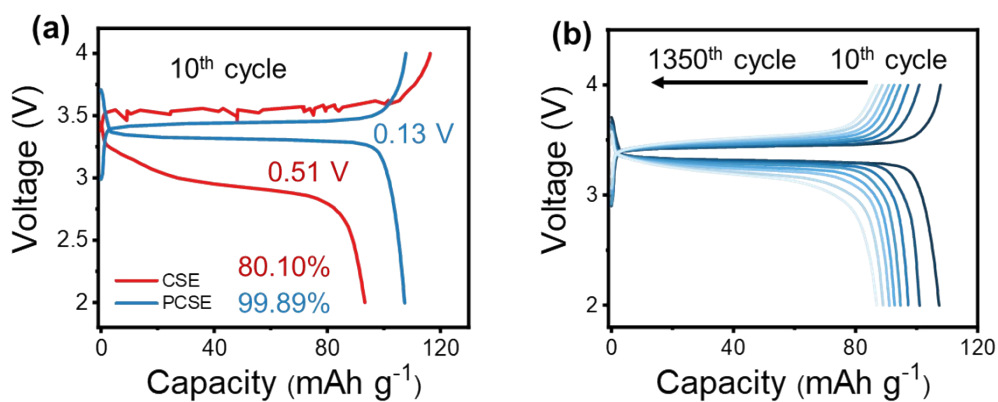

Fig. S8 (a) Charge/discharge profiles of Na|PCSE|NVP and Na|CSE|NVP at 10<sup>th</sup> cycle with a rate of 1 C; (b) charge/discharge profiles of Na|PCSE|NVP with different number of cycles.

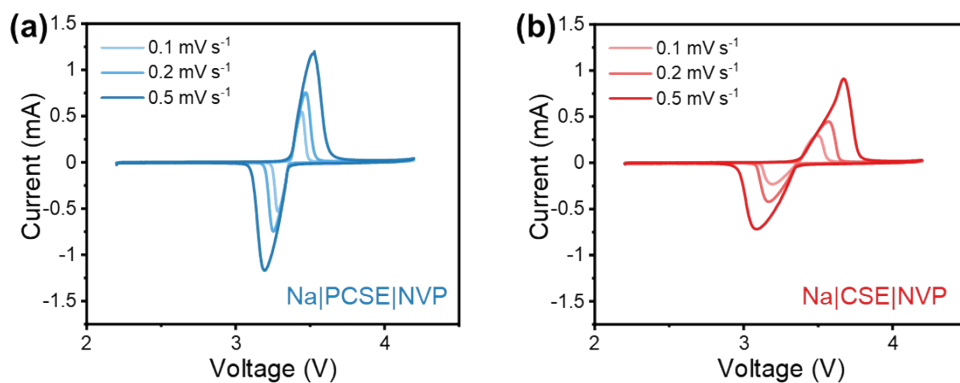

Fig. S9 CV curves of Na|PCSE|NVP and Na|CSE|NVP with different scanning rates.

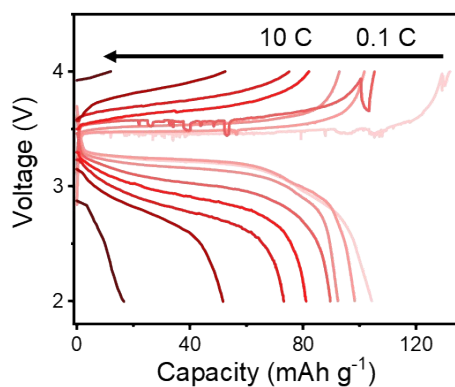

Fig. S10 Charge/discharge profiles of Na|CSE|NVP with different rates.

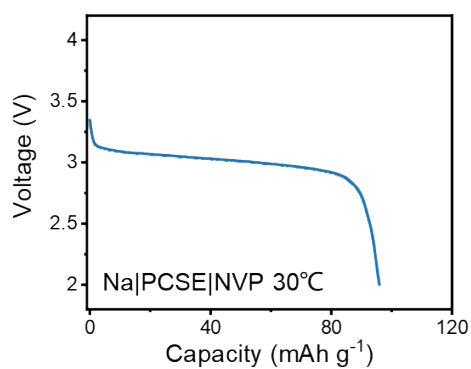

Fig. S11 Discharge profiles of Na|PCSE|NVP at 30°C.

Table S1 Mass ratio of each element in sol-gel product

|                        | Na    | Zr    | P    |
|------------------------|-------|-------|------|
| Element mass ratio (%) | 13.29 | 37.02 | 5.67 |

Table S2 Fitted bulk impedance of SUS|PCSE|SUS and SUS|CSE|SUS at different temperature

| Fitted bulk impedance ( $\Omega$ )     |       |       |       |      |       |      |      |      |      |      |
|----------------------------------------|-------|-------|-------|------|-------|------|------|------|------|------|
| Temperatur<br>e ( $^{\circ}\text{C}$ ) | 30    | 35    | 40    | 45   | 50    | 55   | 60   | 65   | 70   | 75   |
| PCSE                                   | 908.8 | 412.6 | 170.8 | 62.2 | 33    | 15.4 | 11.9 | 9.3  | 6.3  | 4.6  |
| CSE                                    | 31949 | 1101  | 2410  | 718  | 130.9 | 54.3 | 31.2 | 24.1 | 19.3 | 13.6 |

3

The thickness of PCSE and CSE membrane was 118 and 98  $\mu\text{m}$ , respectively. The contact area between the electrolyte membrane and the SUS electrode is 1.96  $\text{cm}^2$ .

Table S3 Bulk and interfacial impedance of Na|PCSE|Na and Na|CSE|Na before and after 30 cycles

|      | $R_{b0}$ ( $\Omega$ ) | $R_{b1}$ ( $\Omega$ ) | $R_{i0}$ ( $\Omega$ ) | $R_{i1}$ ( $\Omega$ ) |
|------|-----------------------|-----------------------|-----------------------|-----------------------|
| PCSE | 10.99                 | 10.89                 | 52.46                 | 128.07                |
| CSE  | 16.61                 | 15.79                 | 124.62                | 188.78                |

$R_b$  represents the bulk impedance,  $R_i$  represents the interfacial impedance,  $_0$  indicates initial state,  $_1$  indicates after 30 charge/discharge cycles

Table S4 Bulk and interfacial impedance of Na|PCSE|NVP and Na|CSE|NVP before and after 100 cycles

|      | $R_{b0}$ ( $\Omega$ ) | $R_{b1}$ ( $\Omega$ ) | $R_{i0}$ ( $\Omega$ ) | $R_{i1}$ ( $\Omega$ ) |
|------|-----------------------|-----------------------|-----------------------|-----------------------|
| PCSE | 12.64                 | 14.89                 | 65.20                 | 21.73                 |
| CSE  | 16.31                 | 18.98                 | 99.38                 | 105.96                |

$R_b$  represents the bulk impedance,  $R_i$  represents the interfacial impedance,  $_0$  indicates

initial state,  $\rho_1$  indicates after 100 charge/discharge cycles

Table S5 A comparison of the conditions and cycling performance of Na|PCSE|NVP with recently published PEO-based sodium solid-state electrolytes (\* denotes quasi-solid-state design)

| Solid electrolyte                                                                                       | Cathode                             | Temperature (°C) | Rate (C) | Initial capacity (mAh g <sup>-1</sup> ) | Cycles      | Capacity retention (%) |
|---------------------------------------------------------------------------------------------------------|-------------------------------------|------------------|----------|-----------------------------------------|-------------|------------------------|
| 1.FMC-ASPE <sup>1</sup>                                                                                 | NVP                                 | 80               | 0.5      | 107.5                                   | 400         | 89                     |
| 2.NZ-PEO@IL <sup>*2</sup>                                                                               | NVP                                 | 60               | 0.5      | 104.5                                   | 150         | 90                     |
| 3.PEPA@NC <sup>3</sup>                                                                                  | FeHCF                               | 60               | 0.2      | 100                                     | 350         | 77.2                   |
| 4.BPCE <sup>4</sup>                                                                                     | NVP                                 | 50               | 0.5      | 107                                     | 300         | 88.5                   |
| 5.PEO-NaClO <sub>4</sub> -Na <sub>3</sub> Zr <sub>2</sub> Si <sub>2</sub> PO <sub>12</sub> <sup>5</sup> | MnHCF                               | 60               | 0.5      | 109.3                                   | 300         | 83                     |
| 6.CPE-IL40 <sup>*6</sup>                                                                                | NVP                                 | 60               | 0.1      | 98                                      | 70          | 86.7                   |
| 7.SPE <sup>7</sup>                                                                                      | NaNFM                               | 60               | 0.1      | 102.4                                   | 80          | 90                     |
| 8.PEO/NZTO <sup>8</sup>                                                                                 | NVP                                 | 80               | 0.2      | 95                                      | 100         | 89.4                   |
| 9.PEO-β-Al <sub>2</sub> O <sub>3</sub> <sup>9</sup>                                                     | NVP                                 | 60               | 0.2      | 93.1                                    | 100         | 83.6                   |
| 10.PEO-P-N <sup>10</sup>                                                                                | NVP                                 | 60               | 1        | 102                                     | 500         | 87.2                   |
| 11.ATFPE <sup>11</sup>                                                                                  | NVP                                 | 60               | 1        | 87.3                                    | 1000        | 78.2                   |
| 12.2N8D+FEC <sup>*12</sup>                                                                              | NVP                                 | 60               | 0.5      | 108                                     | 200         | 50.3                   |
| 13.CPE <sup>13</sup>                                                                                    | NVP                                 | 60               | 0.5      | 102                                     | 250         | 86                     |
| 14.PE-PEO/NaTFSI <sup>14</sup>                                                                          | NVP                                 | 80               | 0.1      | 115                                     | 200         | 88.7                   |
| 15.BSPCE <sup>15</sup>                                                                                  | NVP                                 | 60               | 0.1      | 115.7                                   | 200         | 86.8                   |
| 16.PSZ <sup>16</sup>                                                                                    | NVP                                 | 80               | 0.5      | 92.3                                    | 200         | 95                     |
| 17.M1 <sup>17</sup>                                                                                     | NaFe(SO <sub>4</sub> ) <sub>2</sub> | 60               | 0.1      | 84                                      | 60          | 89.3                   |
| <b>This work</b>                                                                                        | <b>NVP</b>                          | <b>60</b>        | <b>1</b> | <b>107.9</b>                            | <b>1350</b> | <b>80.5</b>            |



## Reference

1. Y. Su, X. Rong, A. Gao, Y. Liu, J. Li, M. Mao, X. Qi, G. Chai, Q. Zhang, L. Suo, L. Gu, H. Li, X. Huang, L. Chen, B. Liu and Y.-S. Hu, *Nat. Commun.*, 2022, **13**, 4181.
2. L. Shen, S. Deng, R. Jiang, G. Liu, J. Yang and X. Yao, *Energy Storage Mater.*, 2022, **46**, 175-181.
3. T. Wang, M. Zhang, K. Zhou, H. Wang, A. Shao, L. Hou, Z. Wang, X. Tang, M. Bai, S. Li and Y. Ma, *Adv. Funct. Mater.*, 2023, **33**, 2215117.
4. H. Wang, Y. Sun, Q. Liu, Z. Mei, L. Yang, L. Duan and H. Guo, *J. Energy Chem.*, 2022, **74**, 18-25.
5. X. Yu, L. Xue, J. B. Goodenough and A. Manthiram, *ACS Mater. Lett.*, 2019, **1**, 132-138.
6. G. Chen, Y. Bai, Y. Gao, Z. Wang, K. Zhang, Q. Ni, F. Wu, H. Xu and C. Wu, *ACS Appl. Mater. Interfaces*, 2019, **11**, 43252-43260.
7. S. Chen, F. Feng, Y. Yin, H. Che, X.-Z. Liao and Z.-F. Ma, *J. Power Sources*, 2018, **399**, 363-371.
8. J.-F. Wu, Z.-Y. Yu, Q. Wang and X. Guo, *Energy Storage Mater.*, 2020, **24**, 467-471.
9. Y. Yao, Z. Liu, X. Wang, J. Chen, X. Wang, D. Wang and Z. Mao, *J. Mater. Sci.*, 2021, **56**, 9951-9960.
10. E. Matios, H. Wang, J. Luo, Y. Zhang, C. Wang, X. Lu, X. Hu, Y. Xu and W. Li, *J. Mater. Chem. A*, 2021, **9**, 18632-18643.
11. J. Guo, F. Feng, S. Zhao, R. Wang, M. Yang, Z. Shi, Y. Ren, Z. Ma, S. Chen and T. Liu, *Small*, 2023, **19**, 2206740.
12. S. Kang, C.-e. Yang, B. Jeon, B. Koo, S.-T. Hong and H. Lee, *Energy Storage Mater.*, 2021, **39**, 259-264.
13. S. Bag, C. Zhou, S. Reid, S. Butler and V. Thangadurai, *J. Power Sources*, 2020, **454**, 227954.
14. J. Zhang, Y. Su, Y. Qiu, X. Zhang, F. Xu and H. Wang, *ACS Appl. Mater. Interfaces*, 2024, **16**, 30128-30136.
15. J. Guo, F. Feng, X. Jiang, R. Wang, D. Chu, Y. Ren, F. Chen, P. He, Z.-F. Ma, S. Chen and T. Liu, *Adv. Funct. Mater.*, 2024, **34**, 2313496.
16. J. Zhang, Y. Wang, Q. Xia, X. Li, B. Liu, T. Hu, M. Tebyetekerwa, S. Hu, R. Knibbe and S. Chou, *Angew. Chem. Int. Ed.*, 2024, **63**, e202318822.
17. J. Guzmán-Torres, A. G. Sánchez-Valdez, L. L. Garza-Tovar, L. C. Torres-González, E. González-Juárez, I. González-Martínez, A. Espinosa-Roa and E. M. Sánchez-Cervantes, *Polym. Bull.*, 2024, **81**, 2465-2480.
